# Supplementary material
Source: publisher figshare collection journal article supplement (https://karger.figshare.com/ndownloader/files/13724408)
Supplement: Supplementary file 1 [file 13724408]

**Supplementary Figure Legends**

**Figure S1. Effects of Gankyrin on cell proliferation.** Representative images of immunohistochemical findings in tumors of *Cdx2-Cre;Apcf/f* (Cdx2-Cre;Apcf/f) miceand *Cdx2-Cre;Apcf/f;Gankyrinf/f* (Cdx2-Cre;Apcf/f;GKf/f) mice using anti-Ki67 antibody. Scale bar, 50 m.

**Figure S2. Gankyrin expression in non-tumor cells** (A) Colorectal specimens of CRC were taken before chemotherapy. Representative images of CRCs with intensity of the staining scored as 0 (negative), 1 (weak), or 2 (strong) are shown. Immunohistochemical detection of Gankyrin in non-parenchymal cells of CRCs (arrows) are shown. Scale bar, 50 µm. (B) Association between non-tumor cell Gankyrin expression and progression-free survival (PFS) in patients with metastatic CRC. The Kaplan-Meier method was used to determine the PFS and log-rank test was used to compare PFS between patients grouped according to the level of Gankyrin expression in non-tumor cells.

**Figure S3. Association between Gankyrin expression and signaling pathways**

The patients with metastatic colorectal cancer underwent resection of primary cancer followed by systemic chemotherapy containing bevacizumab. Colorectal cancer tissues of the patients with metastatic colorectal cancer (CRC) were stained with anti-Gankyrin, anti-phospho-Akt, and anti--catenin antibody (n = 24). The staining intensity of each protein were compared. Low; low expression. High; high expression.

**Figure S4. Association between protein expression and PFS.** (A-D) Association between the expression of phospho-Akt (A), phospho-ERK (B), -catenin (C) or p53 (D) and progression-free survival (PFS) in patients with metastatic CRC (n = 26). The Kaplan-Meier method was used to determine the PFS and log-rank test was used to compare PFS between patients grouped according to the level of gene expression in tumor cells. (E) Association between the expression of p p53 and overall survival (OS) in patients with metastatic CRC (n = 26). The Kaplan-Meier method was used to determine the OS and log-rank test was used to compare OS between patients grouped according to the level of p53 expression in tumor cells. (F) Colorectal cancer tissues of the patients with metastatic colorectal cancer (CRC) were stained with anti-Gankyrin, and anti-p53 antibody. The staining intensity of each protein were compared. Low; low expression. High; high expression.

**Figure S5. Association between Gankryin and MDR1 expression.** RNA was extracted from tumor tissues of *Cdx2-Cre;Apcf/f* (Cdx2-Cre;Apcf/f) mice (n = 5)and *Cdx2-Cre;Apcf/f;Gankyrinf/f* (Cdx2-Cre;Apcf/f;GKf/f) mice (n = 4). Relative amounts of mRNA of MDR1 gene were determined by real-time qPCR and normalized to the amount of actin mRNA. The amount of each mRNA in the untreated colon was given an arbitrary value of 1.0. Data are means + SEM.
